# Supplementary material for: Reducing dust exposure in indoor climbing gyms
Source: Royal Society of Chemistry journal article supplement (doi:10.1039/c2em30289f), 2012-01-01
Supplement: c2em30289f.pdf [file c2em30289f.pdf]

## Electronic Supplementary Information

**Table:** Kinds of magnesia alba used

| <b>Magnesia alba</b> | <b>Manufacturer</b>                                                                                                                                                                                                                                  |
|----------------------|------------------------------------------------------------------------------------------------------------------------------------------------------------------------------------------------------------------------------------------------------|
| Chalk balls          | Mad Rock, Addiction Chalk, 12 Chalk Balls, Super Dry Scientifically Formulated High Friction Chalk, 1.800.959.5792, (Made in China)<br>(Bar Code 8 70559 01336 9)                                                                                    |
| Liquid chalk         | Beal (The Dynamic Company), Pure Grip, Liquid Chalk, Composition: Alcohol, Magnesium carbonate, thickener, scent. Product # 9172 (in Stuttgart Product #8670), 250 ml,<br><a href="http://www.bealplanet.com">www.bealplanet.com</a> , (Made in EC). |
| Chalk blocks         | Mad Rock, Addiction Chalk, Magnesium Carbonate, Super Dry Scientifically Formulated High Friction Chalk<br><a href="http://www.MadRockClimbing.com">www.MadRockClimbing.com</a> , (Made in China) (Bar Code 8 70559 01503 5)                         |
| Powdered chalk       | Black Diamond, uncut; white gold, Style Number: BD5504950000ALL1,<br><a href="http://www.blackdiamondequipment.com">http://www.blackdiamondequipment.com</a> , (Made in China)                                                                       |
| Sieved chalk         | Triple X GmbH, Chalk Crush (5kg), Article # G32, <a href="http://www.triple-sports.de">www.triple-sports.de</a> ,<br>sieved to 2 – 4 mm diameter at the Institute of Applied Geosciences, Darmstadt                                                  |
